# Carbenoxolone Blocks the Light-Evoked Rise in Intracellular Calcium in Isolated Melanopsin Ganglion Cell Photoreceptors

Jayne R. Bramley, Erin M. Wiles, Patricia J. Sollars, Gary E. Pickard\*

School of Veterinary Medicine and Biomedical Sciences, University of Nebraska, Lincoln, Nebraska, United States of America

## Abstract

**Background:** Retinal ganglion cells expressing the photopigment melanopsin are intrinsically photosensitive (ipRGCs). These ganglion cell photoreceptors send axons to several central targets involved in a variety of functions. Within the retina ipRGCs provide excitatory drive to dopaminergic amacrine cells via glutamatergic signals and ipRGCs are coupled to wide-field GABAergic amacrine cells via gap junctions. However, the extent to which ipRGCs are coupled to other retinal neurons in the ganglion cell layer via gap junctions is unclear. Carbenoxolone, a widely employed gap junction inhibitor, greatly reduces the number of retinal neurons exhibiting non-rod, non-cone mediated light-evoked  $\text{Ca}^{2+}$  signals suggesting extensive intercellular coupling between ipRGCs and non-ipRGCs in the ganglion cell layer. However, carbenoxolone may directly inhibit light-evoked  $\text{Ca}^{2+}$  signals in ipRGCs independent of gap junction blockade.

**Methodology/Principal Findings:** To test the possibility that carbenoxolone directly inhibits light-evoked  $\text{Ca}^{2+}$  responses in ipRGCs, the light-evoked rise in intracellular  $\text{Ca}^{2+}$  ( $[\text{Ca}^{2+}]_i$ ) was examined using fura-2 imaging in isolated rat ipRGCs maintained in short-term culture in the absence and presence of carbenoxolone. Carbenoxolone at 50 and 100  $\mu\text{M}$  concentrations completely abolished the light-evoked rise in  $[\text{Ca}^{2+}]_i$  in isolated ipRGCs. Recovery from carbenoxolone inhibition was variable.

**Conclusions/Significance:** We demonstrate that the light-evoked rise in  $[\text{Ca}^{2+}]_i$  in isolated mammalian ganglion cell photoreceptors is inhibited by carbenoxolone. Since the light-evoked increase in  $[\text{Ca}^{2+}]_i$  in isolated ipRGCs is almost entirely due to  $\text{Ca}^{2+}$  entry via L-type voltage-gated calcium channels and carbenoxolone does not inhibit light-evoked action potential firing in ipRGCs *in situ*, carbenoxolone may block the light-evoked increase in  $[\text{Ca}^{2+}]_i$  in ipRGCs by blocking L-type voltage-gated  $\text{Ca}^{2+}$  channels. The ability of carbenoxolone to block evoked  $\text{Ca}^{2+}$  responses must be taken into account when interpreting the effects of this pharmacological agent on retinal or other neuronal circuits, particularly if a change in  $[\text{Ca}^{2+}]_i$  is the output being measured.

**Citation:** Bramley JR, Wiles EM, Sollars PJ, Pickard GE (2011) Carbenoxolone Blocks the Light-Evoked Rise in Intracellular Calcium in Isolated Melanopsin Ganglion Cell Photoreceptors. PLoS ONE 6(7): e22721. doi:10.1371/journal.pone.0022721

**Editor:** Vadim E. Degtyar, University of California, Berkeley, United States of America

**Received:** November 9, 2010; **Accepted:** July 5, 2011; **Published:** July 29, 2011

**Copyright:** © 2011 Bramley et al. This is an open-access article distributed under the terms of the Creative Commons Attribution License, which permits unrestricted use, distribution, and reproduction in any medium, provided the original author and source are credited.

**Funding:** This work was supported by National Institutes of Health grant R01 EY017809 to PJS and GEP. The funders had no role in study design, data collection and analysis, decision to publish, or preparation of the manuscript.

**Competing Interests:** The authors have declared that no competing interests exist.

\* E-mail: gpickard2@unl.edu

## Introduction

Retinal ganglion cells expressing melanopsin are intrinsically photosensitive (ipRGCs) [1,2] and send signals to a variety of central targets involved in visual perception and non-image forming functions [2–8]. Within the retina, ipRGCs provide light-evoked excitatory (glutamatergic) drive to a subset of dopaminergic amacrine cells that play a key role in reconfiguring retinal function according to prevailing illumination conditions [9]. Signals from ipRGCs may also propagate to other neurons in the ganglion cell layer of the retina, such as wide-field GABAergic amacrine cells, via electrical coupling through gap junctions [10].

Gap junctions/electrical synapses are abundant throughout the plexiform layers of the retina and are diverse in their ultrastructural morphology [11,12]. Electrical coupling via gap junctions plays an important role in communication among many types of retinal neuron [11,13]. Extensive gap junction-mediated coupling

between ipRGCs and other retinal neurons in the ganglion cell layer was first reported by Sekaran and colleagues [14,15] based on the large reduction (>50%) of retinal cells exhibiting light-evoked increases in cytosolic  $\text{Ca}^{2+}$  in the presence of carbenoxolone, a compound widely used to block gap junctions [16]. However, carbenoxolone similarly applied to the retina maintained *in vitro* for multielectrode recording does not decrease the number of retinal neurons generating light-evoked action potentials [17,18]. The explanation for these divergent results is currently unknown but may be related to the different endpoints that were measured in these studies: light-evoked action potentials [17,18] vs light-evoked calcium responses [14,15].

The primary cellular mechanism mediating the light-evoked elevation in ipRGC intracellular calcium levels ( $[\text{Ca}^{2+}]_i$ ) is by  $\text{Ca}^{2+}$  influx through L-type voltage-gated calcium channels (VGCC) (Cav1 of more recent nomenclature [19]);  $\approx 90\%$  of the light-evoked increase in ipRGC  $[\text{Ca}^{2+}]_i$  in isolated cells *in vitro* was

attributed to L-type VGCC activation subsequent to light-evoked depolarization and action potential firing [20]. Thus, if in addition to blocking gap junctions, carbenoxolone also acts downstream of light-evoked depolarization and action potential generation to inhibit L-type VGCC, then carbenoxolone would inhibit the light-evoked elevation in  $[Ca^{2+}]_i$  while having no measurable effect on light-evoked action potential firing in ipRGCs. Indeed, carbenoxolone does suppress  $Ca^{2+}$  signals in isolated amphibian cone photoreceptors and reduces depolarization-evoked  $[Ca^{2+}]_i$  responses in amphibian retinal slices by blocking voltage-gated calcium channels [21]. It is not known if carbenoxolone acts directly on mammalian ganglion cell photoreceptors to inhibit light-evoked  $Ca^{2+}$  responses.

In this study we examined light-evoked calcium responses of isolated ipRGCs maintained *in vitro* in the absence and presence of carbenoxolone. Carbenoxolone blocked completely the light-evoked increase in  $[Ca^{2+}]_i$  in isolated ipRGCs. The data indicate that evaluation of gap junction coupling using carbenoxolone as a blocker and changes in  $[Ca^{2+}]_i$  as an output measure must consider a possible direct effect of this compound on membrane calcium channels.

## Results

### Light-evoked $Ca^{2+}$ response in isolated ipRGCs

Calcium imaging experiments were conducted on cultured melanopsin-expressing ipRGCs 1–2 days after their isolation from neonatal rats. Retinal ganglion cells isolated by melanopsin-immunopanning were cultured at low density allowing analyses to be performed on individual cells that were not in physical contact with other ipRGCs. Melanopsin-immunopanned RGCs retained their intrinsic photosensitivity *in vitro* and responded to light stimuli with an elevation in  $[Ca^{2+}]_i$  that rapidly returned toward baseline levels after termination of the light stimulus (Fig. 1).

### The effect of carbenoxolone on the light-evoked $Ca^{2+}$ response in ipRGCs

To determine the direct effect of the gap junction blocker carbenoxolone on light-induced  $Ca^{2+}$  responses in individual ipRGCs, carbenoxolone was delivered to the recording chamber after two light-evoked  $Ca^{2+}$  responses had been recorded.

Carbenoxolone reduced the light-evoked  $Ca^{2+}$  response in isolated ipRGCs in a concentration-related manner (0.1–100  $\mu$ M) although the extent of inhibition was quite variable among ipRGCs at the intermediate concentrations tested (1 and 10  $\mu$ M) and complete inhibition of the light-evoked  $Ca^{2+}$  response was observed in at least some cells at all concentrations examined except 100 nM. In the presence of 100  $\mu$ M carbenoxolone, the concentration typically used to block gap junctions between neurons maintained *in vitro* [14,21–25], the light-induced  $Ca^{2+}$  response in individual ipRGCs was completely abolished ( $1.6 \pm 1.2\%$  of the baseline light-evoked  $Ca^{2+}$  response;  $n = 5$ ,  $p < 0.01$ ) (Figs. 2a and 2b).

Recovery from carbenoxolone inhibition of the light-evoked  $Ca^{2+}$  response in individual ipRGCs was evaluated by recording three light-evoked  $Ca^{2+}$  responses spaced 15 min apart during carbenoxolone washout. The level of recovery of the light-evoked  $Ca^{2+}$  response was related to the concentration of carbenoxolone tested with greater recovery at the lower concentrations. However, recovery of the light-evoked  $Ca^{2+}$  response was variable; 5 of 20 cells showed complete recovery whereas 8 of the 20 ipRGCs showed no recovery after 45 min (light-evoked  $Ca^{2+}$  response  $< 5\%$  of the base line light-evoked  $Ca^{2+}$  response, Table 1). These data are in agreement with findings reported by others indicating that it is difficult or impossible to reverse the effects of carbenoxolone [26].

### Glutamate-evoked $Ca^{2+}$ responses in isolated ipRGCs

In an attempt to demonstrate that ipRGCs remained capable of generating an evoked  $Ca^{2+}$  response after 100  $\mu$ M carbenoxolone application and washout despite the lack of a light-evoked  $Ca^{2+}$  response, we examined glutamate-evoked  $Ca^{2+}$  responses; it has been shown previously that glutamate application (10–100  $\mu$ M) evokes a rise in  $[Ca^{2+}]_i$  in isolated ipRGCs [20]. The glutamate-evoked rise in  $[Ca^{2+}]_i$  in ipRGCs could result from  $Ca^{2+}$  admitted via NMDA and/or AMPA/kainate-type glutamate receptors and via the activation of VGCC occurring after membrane depolarization and action potential firing resulting from glutamate receptor stimulation, as described for immunopanned conventional RGCs [27]. We first confirmed that brief glutamate application (100  $\mu$ M; 15 sec) evoked action potentials in isolated ipRGCs by stimulating cells with glutamate in the absence and presence of

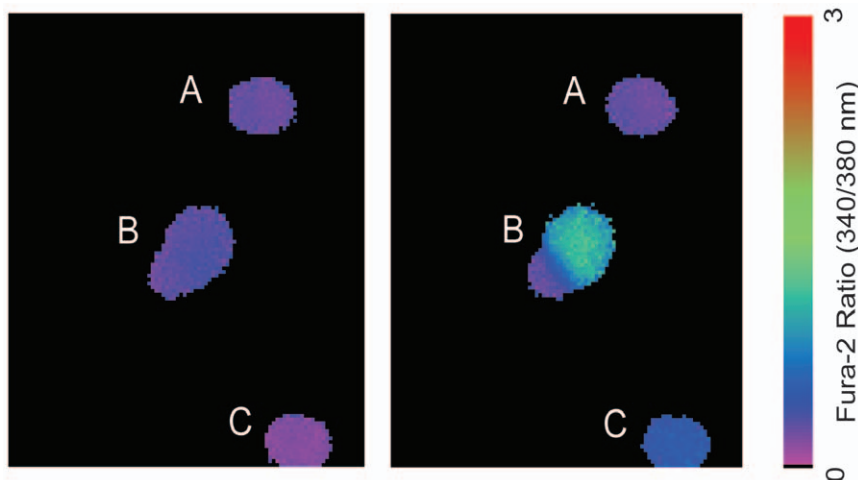

**Figure 1. Pseudocolored images of fura-2 fluorescence ratios (340/380 nm) for melanopsin-panned retinal ganglion cells before and during light stimulation.** Cells labeled B and C responded to the broad-spectrum 60 sec light pulse with an increased  $[Ca^{2+}]_i$ , establishing these cells as ipRGCs. The cell labeled A was unresponsive to the light pulse and the baseline  $[Ca^{2+}]_i$  did not change. doi:10.1371/journal.pone.0022721.g001

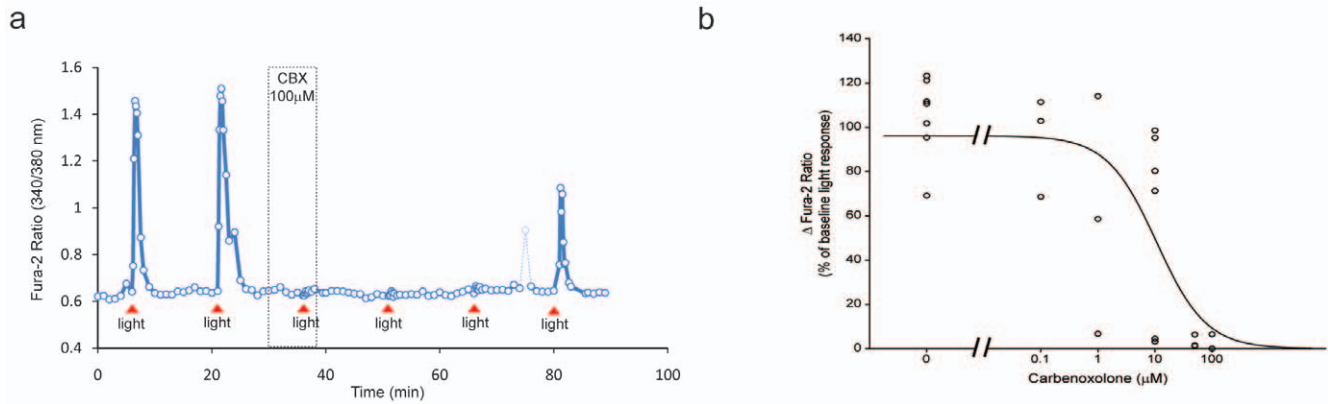

**Figure 2. Light-evoked  $\text{Ca}^{2+}$  responses in ipRGCs in the absence and presence of carbenoxolone.** (a) The light-evoked elevation in  $[\text{Ca}^{2+}]_i$  in an isolated ipRGC was completely blocked in the presence of 100  $\mu\text{M}$  carbenoxolone (CBX) with only partial recovery after the third light pulse presented after 45 min of wash out. (b) Dose-response data illustrating inhibition of baseline light-evoked  $\text{Ca}^{2+}$  response in the presence of 0.1, 1, 10, 50 and 100  $\mu\text{M}$  carbenoxolone. Only ipRGCs showing at least partial recovery after carbenoxolone washout are included. The light-evoked  $\text{Ca}^{2+}$  responses from seven ipRGCs in the absence of carbenoxolone (0  $\mu\text{M}$ ) are included. These cells gave four consecutive light-evoked  $\text{Ca}^{2+}$  responses (values provided are the third light-evoked  $\text{Ca}^{2+}$  response compared to preceding light-evoked  $\text{Ca}^{2+}$  response as baseline). The curve was fit with a three-parameter logistic equation ( $\text{EC}_{50} = 11 \mu\text{M}$ ). Non-evoked elevations in  $[\text{Ca}^{2+}]_i$  in isolated ipRGCs, due to spontaneous action potential firing, are de-emphasized by plotting data with lightened dashed lines.  
doi:10.1371/journal.pone.0022721.g002

**Table 1.** Carbenoxolone inhibition of the light-evoked  $\text{Ca}^{2+}$  response in solitary ipRGCs in vitro is difficult to reverse.

| Carbenoxolone Dose ( $\mu\text{M}$ ) | Recovery of Light-evoked $\text{Ca}^{2+}$ Response | ipRGC (n) |
|--------------------------------------|----------------------------------------------------|-----------|
| 100                                  | complete recovery (30 min)                         | 1         |
|                                      | partial recovery                                   | 1         |
|                                      | no recovery                                        | 3         |
| 50                                   | complete recovery (15 min)                         | 2         |
|                                      | partial recovery                                   | 1         |
|                                      | no recovery                                        | 1         |
| 10                                   | no inhibition                                      | 2         |
|                                      | complete recovery (15 min)                         | 1         |
|                                      | partial recovery                                   | 3         |
|                                      | no recovery                                        | 1         |
| 1.0                                  | no inhibition                                      | 1         |
|                                      | complete recovery (15 min)                         | 1         |
|                                      | partial recovery                                   | 1         |
|                                      | no recovery                                        | 3         |
| 0.1                                  | no inhibition                                      | 2         |
|                                      | partial recovery                                   | 1         |

**Complete Recovery:** ipRGCs demonstrating light-evoked  $\text{Ca}^{2+}$  responses during carbenoxolone (CBX) washout (45 min) that were  $\geq 100\%$  of the light-evoked  $\text{Ca}^{2+}$  response immediately prior to drug treatment were classified as demonstrating complete recovery (n = 5). (time elapsed when complete recovery was noted)

**Partial Recovery:** ipRGCs demonstrating light-evoked  $\text{Ca}^{2+}$  responses during CBX washout (45 min) that were greater than the light-evoked  $\text{Ca}^{2+}$  response during CBX application and between 50–90% of the light-evoked  $\text{Ca}^{2+}$  response immediately prior to drug treatment were classified as demonstrating partial recovery (n = 7).

**No Recovery:** ipRGCs demonstrating light-evoked  $\text{Ca}^{2+}$  responses during CBX washout (45 min) that remained  $< 5\%$  of the light-evoked  $\text{Ca}^{2+}$  response immediately prior to drug treatment were classified as demonstrating no recovery (n = 8).

**No Inhibition:** ipRGCs demonstrating light-evoked  $\text{Ca}^{2+}$  responses in the presence of CBX that were between 95–120% of the preceding light-evoked  $\text{Ca}^{2+}$  response in the absence of CBX were classified as demonstrating no inhibition (n = 5).

doi:10.1371/journal.pone.0022721.t001

tetrodotoxin (TTX) which prevents action potential generation by blocking voltage-gated  $\text{Na}^+$  channels. TTX ( $1 \mu\text{M}$ ) significantly inhibited the glutamate-evoked rise in  $[\text{Ca}^{2+}]_i$  with responses  $43.5 \pm 10.5\%$  of baseline ( $n = 4$ ,  $p < 0.01$ ) (Fig. 3a,c). In addition, TTX produced a robust inhibition of the light-evoked increase in  $[\text{Ca}^{2+}]_i$  in all cells tested (Fig. 3a), confirming previous observations [20]. These data suggest that the glutamate-evoked rise in  $[\text{Ca}^{2+}]_i$  resulted from  $\text{Ca}^{2+}$  entry via glutamate receptors permeant to  $\text{Ca}^{2+}$  and with the majority of the elevation in  $[\text{Ca}^{2+}]_i$  due to activation of VGCC following action potential generation.

To confirm that VGCC are activated by glutamate in isolated ipRGCs we stimulated cells with glutamate ( $100 \mu\text{M}$ ; 15 sec) in the absence and presence of verapamil, an L-type VGCC antagonist, that has been shown previously to inhibit light-evoked activation of L-type VGCC in isolated ipRGCs resulting from action potential generation [20]. Verapamil ( $10 \mu\text{M}$ ) significantly reduced the glutamate-evoked elevation in  $[\text{Ca}^{2+}]_i$  ( $29.7 \pm 4.4\%$  of baseline response,  $n = 8$ ,  $p < 0.01$ ) (Fig. 3b,c). These data and the TTX data described above suggest that the glutamate-evoked rise in  $[\text{Ca}^{2+}]_i$  results from  $\text{Ca}^{2+}$  admitted through glutamate receptors followed by action potential generation and activation of L-type VGCC.

Lastly we asked whether the glutamate-evoked rise in  $[\text{Ca}^{2+}]_i$  is reduced by carbenoxolone. After establishing that cells were light responsive and that they responded to glutamate ( $100 \mu\text{M}$ ; 15 sec) with an evoked rise in  $[\text{Ca}^{2+}]_i$  (baseline response), cells were

stimulated with light in the absence of carbenoxolone (for a baseline  $\text{Ca}^{2+}$  response) followed by light in the presence of carbenoxolone ( $100 \mu\text{M}$ ) and then glutamate ( $100 \mu\text{M}$ ; 15 sec) in the presence of carbenoxolone. The light-evoked  $\text{Ca}^{2+}$  response was again completely blocked by  $100 \mu\text{M}$  carbenoxolone, ( $3.0 \pm 0.4\%$  of baseline response,  $n = 7$ ,  $p < 0.001$ , Student's t-test) (Figs. 4a,b) confirming the findings in the initial experiment described above. Carbenoxolone also significantly reduced the glutamate-evoked elevation in  $[\text{Ca}^{2+}]_i$  ( $54.7 \pm 12.1\%$  of baseline,  $n = 7$ ,  $p < 0.01$ ) (Figs. 4a,b).

These latter data indicate that in the presence of  $100 \mu\text{M}$  carbenoxolone, ipRGCs remained viable and were capable of generating a glutamate-evoked  $\text{Ca}^{2+}$  response despite their lack of an increase in  $[\text{Ca}^{2+}]_i$  in response to light stimulation. This finding validates the observed inhibition of the light-evoked  $\text{Ca}^{2+}$  response in the absence of recovery from carbenoxolone in ipRGCs in the initial experiment above. Comparison of the data from the initial experiment of  $100 \mu\text{M}$  carbenoxolone inhibition of light-evoked  $\text{Ca}^{2+}$  responses ( $n = 5$ ) with this last experiment examining  $100 \mu\text{M}$  carbenoxolone inhibition of light-evoked  $\text{Ca}^{2+}$  responses ( $n = 7$ ) revealed no significant difference in the level of carbenoxolone inhibition ( $1.6 \pm 1.2\%$  vs  $3.0 \pm 0.4\%$ ,  $p > 0.05$ ). It can be concluded that  $100 \mu\text{M}$  carbenoxolone virtually eliminates the light-evoked elevation in  $[\text{Ca}^{2+}]_i$  in isolated ipRGCs. In addition, comparison of the glutamate-evoked  $\text{Ca}^{2+}$  responses in the presence of TTX, verapamil, or carbenoxolone revealed no

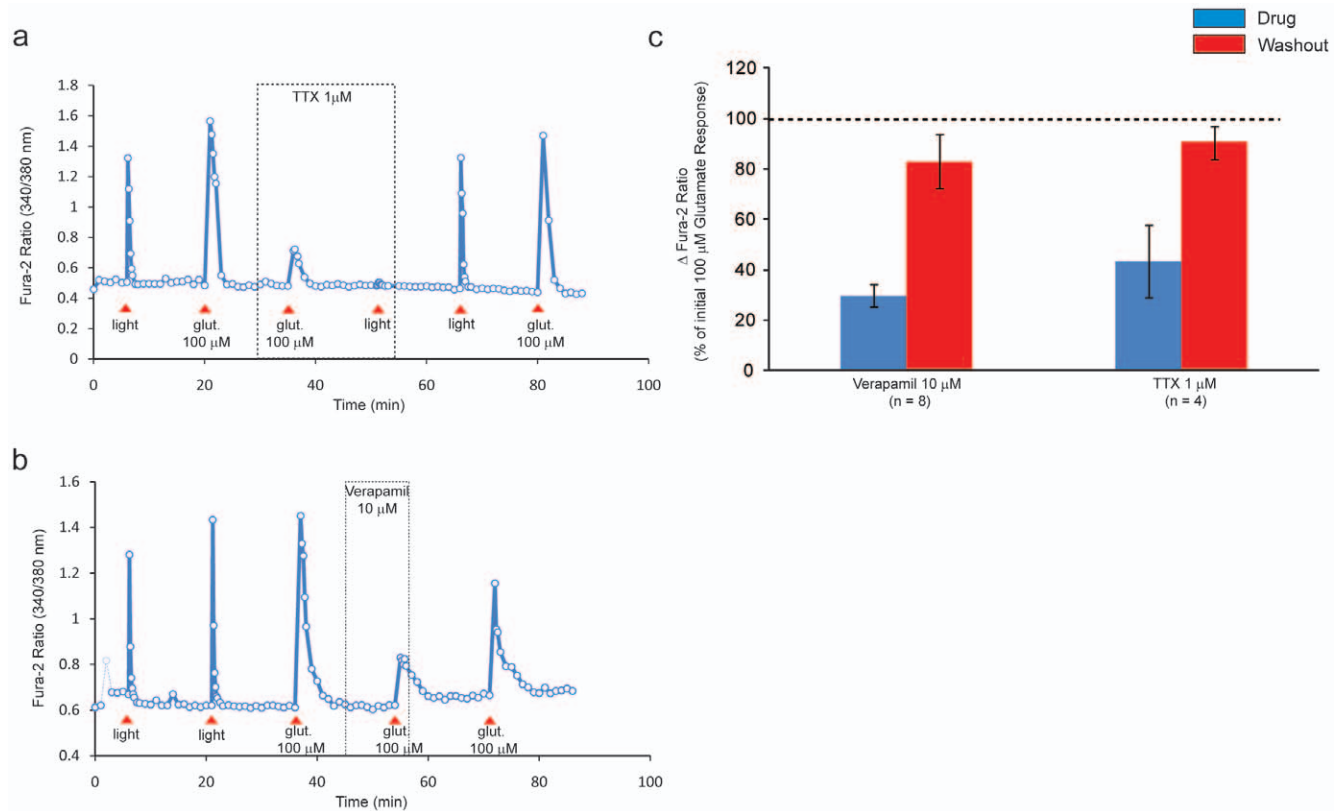

**Figure 3. Glutamate-evoked  $\text{Ca}^{2+}$  responses in ipRGCs in the absence and presence of tetrodotoxin or verapamil.** (a) The glutamate-evoked (Glut  $100 \mu\text{M}$ )  $\text{Ca}^{2+}$  response in an isolated ipRGC was reversibly inhibited by tetrodotoxin (TTX,  $1 \mu\text{M}$ ) and the light-evoked rise in  $[\text{Ca}^{2+}]_i$  was completely blocked. (b) The glutamate-evoked increase in  $[\text{Ca}^{2+}]_i$  was reversibly inhibited by verapamil ( $10 \mu\text{M}$ ). (c) Summary (means  $\pm$  SEM, normalized to the pretreatment responses) demonstrating reversible inhibition of the glutamate-evoked rise in  $[\text{Ca}^{2+}]_i$  by tetrodotoxin ( $n = 4$ ) and verapamil ( $n = 8$ ).  $p < 0.01$ , one-way repeated measures ANOVA, Tukey's post-hoc test compared to initial and recovery responses for TTX and verapamil.

doi:10.1371/journal.pone.0022721.g003

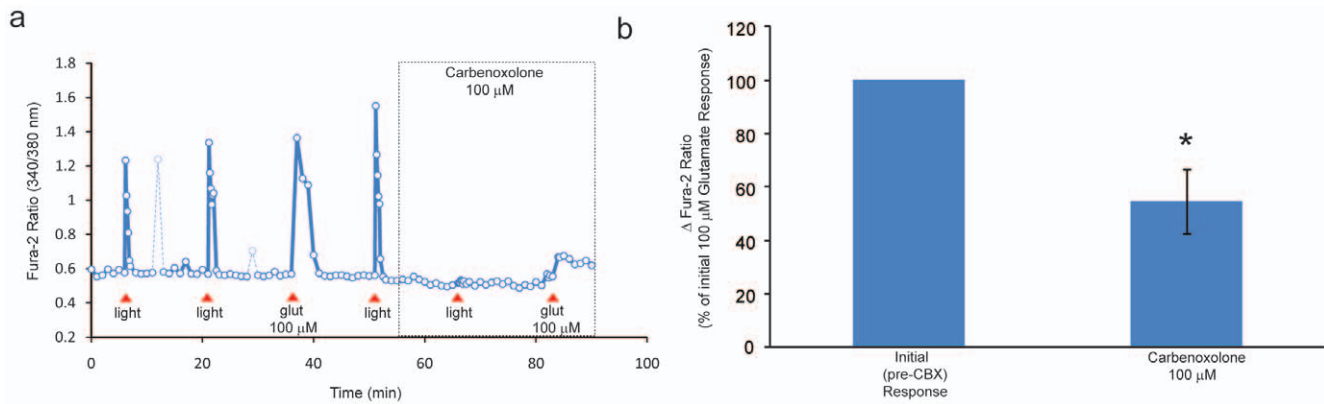

**Figure 4. Carbenoxolone inhibition of glutamate-evoked  $\text{Ca}^{2+}$  responses in ipRGCs.** (a) Carbenoxolone (CBX, 100  $\mu\text{M}$ ) completely blocked the light-evoked rise in  $[\text{Ca}^{2+}]_i$  and inhibited the glutamate-evoked elevation in  $[\text{Ca}^{2+}]_i$  (b) Summary (means  $\pm$  SEM, normalized to the pretreatment responses) illustrating the carbenoxolone inhibition of glutamate-evoked rise in  $\text{Ca}^{2+}$  (following complete inhibition of the light-evoked  $\text{Ca}^{2+}$  response). \*  $p < 0.01$ , Student's t-test ( $n = 7$ )  
doi:10.1371/journal.pone.0022721.g004

significant difference in the inhibitory effect of the three compounds on the level of the glutamate-evoked elevation of  $[\text{Ca}^{2+}]_i$  (one-way ANOVA,  $p > 0.10$ ).

## Discussion

The principal novel finding in this study is the demonstration that carbenoxolone, a widely used agent for inhibiting neuronal gap junctions, abolished the light-evoked elevation in  $[\text{Ca}^{2+}]_i$  in solitary, isolated mammalian retinal ganglion cell photoreceptors maintained in short-term culture. Importantly, carbenoxolone blocked the light-evoked  $\text{Ca}^{2+}$  response by acting directly on the ipRGCs as these neurons lacked any physical contact with other ipRGCs or other retinal cells in culture. The effects of carbenoxolone on evoked- $\text{Ca}^{2+}$  responses in the present study were obtained by stimulating isolated, individual mammalian retinal neuron photoreceptors with light, coupled with non-invasive calcium imaging. Our findings are in agreement with those of Vessey and colleagues [21] who examined the effects of carbenoxolone on calcium currents (with  $\text{Ba}^{2+}$  as a charge carrier) obtained by depolarizing voltage-clamped amphibian cone photoreceptors using whole-cell patch-clamp procedures. The data are consistent with the interpretation that carbenoxolone directly blocks L-type voltage-gated calcium channels. Although the possibility that carbenoxolone may have stimulated the release of unknown tropic factors from cells in the cultures that subsequently inhibited the evoked  $\text{Ca}^{2+}$  responses can not be entirely eliminated, it is clear that the effect of carbenoxolone on the light-evoked  $\text{Ca}^{2+}$  response in the present study was not the result of carbenoxolone blocking gap junctions between ganglion cell photoreceptors.

It was first reported that ipRGCs were extensively coupled to other cells in the ganglion cell layer of the retina via gap junctions based on the reduction in the number of cells demonstrating a light-evoked  $\text{Ca}^{2+}$  response in the presence of carbenoxolone [14, 15]. Sekaran and colleagues measured light-evoked  $\text{Ca}^{2+}$  responses in ipRGCs using fura-2 AM ratiometric imaging in the absence and presence of 100  $\mu\text{M}$  carbenoxolone [14], similar to the procedures used in the current study, but with an important difference. In the current study light-evoked  $\text{Ca}^{2+}$  responses were measured in individual ipRGCs in isolation, whereas Sekaran and co-workers examined light-evoked  $\text{Ca}^{2+}$  responses in retinas

maintained *in vitro* [14]. It is clear from the present study, that carbenoxolone applied to retinas *in vitro* [14,15] would have inhibited the light-evoked elevation in  $[\text{Ca}^{2+}]_i$  in ipRGCs, in addition to blocking gap junction coupling between retinal cells. This direct action of carbenoxolone on light-evoked  $\text{Ca}^{2+}$  responses in ipRGCs would have resulted in Sekaran and colleagues greatly overestimating the extent of coupling between ipRGCs and other cells in the ganglion cell layer of the retina [14,15]. It has recently been shown that ipRGCs in the mouse retina injected with the tracer Neurobiotin are tracer-coupled to wide-field GABAergic amacrine cells in the ganglion cell layer; there was no evidence for homologous tracer-coupling of ipRGCs or heterologous coupling to other types of ganglion cells [10]. Thus, it is possible that following the light-evoked depolarization of ipRGCs, calcium signals could propagate from ipRGCs to displaced GABAergic amacrine cells via gap junctions, explaining the carbenoxolone-induced reduction in measurable light-evoked  $\text{Ca}^{2+}$  responses in the ganglion cell layer reported by Sekaran and colleagues [14,15]. However, a more likely explanation for the large reduction (rather than complete elimination) of the light-evoked  $\text{Ca}^{2+}$  responses in cells in the ganglion cell layer described by Sekaran and co-workers [14], is that the carbenoxolone blockade of light-evoked  $\text{Ca}^{2+}$  responses in ipRGCs in the intact retina was simply incomplete due to diffusion barriers [14,15].

The interpretation that the inhibitory effect of carbenoxolone on the light-evoked  $\text{Ca}^{2+}$  response in ipRGCs was due to the blockade of L-type VGCC is based on several observations. The primary source for light-evoked elevations in ipRGC  $[\text{Ca}^{2+}]_i$  is via L-type VGCC after light-induced depolarization and action potential firing [20]; Vessey and colleagues [21] reported carbenoxolone inhibition of VGCC in amphibian cone photoreceptors. However, the light-evoked rise in  $\text{Ca}^{2+}$  in ipRGCs occurs after photon capture by melanopsin and membrane depolarization which is believed to be mediated via canonical transient receptor potential (TRP) channels [20,28–30]. If in our study carbenoxolone blocked TRP C channels then it would have inhibited the light-induced rise in  $\text{Ca}^{2+}$  by preventing the ipRGCs from depolarizing and firing action potentials. However, carbenoxolone did not alter light-evoked action potential generation in ipRGCs [17,18] making it very unlikely that in our study carbenoxolone inhibited TRP C channels in ipRGCs to any significant extent or effected light-induced action potential generation.

Additional evidence in support of the interpretation that carbenoxolone blocks L-type VGCC comes from the glutamate-evoked elevation in  $[Ca^{2+}]_i$  in ipRGCs described in this study. Glutamate acting via glutamate receptors on ipRGCs produces membrane depolarization followed by action potential generation and activation of L-type VGCC; the glutamate evoked rise in  $Ca^{2+}$  was significantly reduced by TTX which blocks action potential generation. The residual  $Ca^{2+}$  response in the presence of TTX was from  $Ca^{2+}$  entry via NMDA and/or AMPA/kainate-type glutamate receptors which are permeable to  $Ca^{2+}$ . Thus, blocking glutamate-evoked action potentials eliminates activation of L-type VGCC. Indeed, we next demonstrated that verapamil, a selective L-type VGCC antagonist, inhibited the glutamate-evoked rise in  $Ca^{2+}$  to the same degree as blockade by TTX. Thus if carbenoxolone blocked L-type VGCC, it would be predicted that carbenoxolone would produce a similar level of antagonism as TTX and verapamil; the carbenoxolone inhibition of the glutamate-evoked elevation in  $[Ca^{2+}]_i$  in ipRGCs was not significantly different from that observed with TTX or verapamil. Taken together, the data strongly suggest that carbenoxolone inhibits L-type VGCC.

Although carbenoxolone is a widely used gap junction inhibitor, the effects of carbenoxolone are difficult and at times impossible to reverse, as reported here and as described in the literature. Pharmacological agents that block gap junctions and are potentially more easily reversible, such as the fenamates, have been sought [31]. Flufenamic acid derivatives have been shown to block gap junction coupling between neurons and meclofenamic acid is a very effective gap junction blocker in the retina [26,32,33]. Importantly, meclofenamic acid has also been reported not to reduce the number of retinal ganglion cells (ipRGCs) exhibiting light-evoked action potentials, similar to carbenoxolone application [18]. However, also similar to carbenoxolone, in the presence of meclofenamic acid (100  $\mu$ M), light-evoked increases in  $[Ca^{2+}]_i$  were completely blocked in individual immunopanned ipRGCs, and the effect was not easily reversible (Bramley, Sollars and Pickard, unpublished observations). Thus, inhibition of VGCC should also be considered when using meclofenamic acid as a gap junction blocker.

In summary, carbenoxolone, a water-soluble membrane permeant pharmacological agent derived from licorice root, inhibits gap junctions but also has actions on other membrane channels including VGCC. Thus it is not a compound that can be used reliably when  $Ca^{2+}$  responses are the outcome measure or when attempting to assign a role for gap junctions in complex physiological network responses such as those that occur in the retina.

## Materials and Methods

### Ethics Statement

The use of animals in this study was approved by the University of Nebraska-Lincoln Institutional Animal Care and Use Committee (ID 391) and all experiments were conducted according to NIH guidelines in Principles of Laboratory Animal Care.

### Immunopanned RGC Cultures

Isolation of melanopsin-expressing ipRGCs was performed as previously described [20]. Briefly, Long-Evans rat pups (6–8 per panning session) were killed at age 5–7 days postnatal by halothane overexposure and decapitation. A single-cell retinal suspension was produced through enzymatic dissociation of dissected retinas (in  $Ca^{2+}/Mg^{2+}$ -free Dulbecco's phosphate-buffered saline

[DPBS] with papain and DNase) and mechanical trituration; melanopsin-expressing RGCs were isolated using a melanopsin-antibody panning protocol with a rabbit melanopsin antibody (F7884) generated against the N-terminal 19 amino acid sequence of rat melanopsin. Melanopsin-panned cells were plated into wells containing a poly-D-lysine/laminin-coated Biocoat glass coverslip and 750  $\mu$ l of culture medium consisting of Neurobasal-A plus 2% B27 supplements, 1 mM glutamine, 25 ng/ml BDNF, 10 ng/ml CNTF, 5  $\mu$ M forskolin, and 10  $\mu$ g/ml gentamicin. Cultures were maintained in the dark at 37°C in a humidified 5%  $CO_2$ -air atmosphere.

### Calcium Imaging

After 1–2 days in culture, the coverslip-plated melanopsin-panned cells were transferred to modified Hank's balanced salt solution (HBSS; 15 mM HEPES, 2.6 mM  $CaCl_2$ ,  $Mg^{2+}$ -free, pH 7.4) containing 5  $\mu$ M fura-2 AM calcium indicator dye for 30 min in the dark at 35°C. The fura-loaded cells were then transferred to a microscope chamber that was constantly superfused with HBSS warmed to 33–35°C and bubbled with 100% oxygen. All tested drugs were dissolved in the HBSS and delivered to the chamber by a peristaltic pump at a rate of  $\approx$ 1 ml/min.

For calcium imaging, a 100 W mercury lamp and the appropriate filters (excitation 340 or 380 nm; emission 510 nm) were used to generate fura-2 fluorescence. A filter wheel alternated the 340 and 380 nm filters with a 400 ms excitation period for each wavelength. Fluorescence images (12-bit) were captured with a cooled charged-coupled device camera fitted to an Axioskop 2 FS upright microscope using a water-immersion objective (N.A. 0.80W; Achroplan 40x). The images of RGC fluorescence at 340 and 380 nm excitation were calculated over a large area of the RGC soma and converted to ratiometric (340/380 nm) images by imaging software (Imaging Workbench 2.2; Axon Instruments, Foster City, CA). The background fluorescence was measured from a region on the coverslip devoid of RGCs and subtracted from each image.

To minimize the intensity of the fura-2 excitation wavelengths (and reduce potential ipRGC stimulation), 8 X 8 pixel binned images were acquired. With this increased binning, adequate fluorescence was attained after reducing the 340 and 380 nm excitation intensities with  $-0.5$  and  $-2.5$  log neutral density filters, respectively. Light responses were calculated as the  $\Delta$  fura-2 ratio, the peak minus baseline fura-2 ratio. The baseline response was calculated as the average fura-2 ratio of the 3 ratios acquired prior to light or drug exposure and the peak was the maximum fura-2 ratio observed in the 100 s following light offset or drug termination.

The isolated cells were stimulated with broad-spectrum light from a 100 W halogen bulb, with light passing through the condenser underneath the microscope chamber. One minute light stimuli were used and the halogen light was blocked every 10 s to allow for the acquisition of fura-2 images. Light stimulation was remotely triggered using an electronic shutter. The standard light stimulus utilized in the experiments was measured as approximately  $2.0 \times 10^{13}$  photons/s/cm at 420 nm,  $6.9 \times 10^{13}$  photons/s/cm at 480 nm,  $1.7 \times 10^{14}$  photons/s/cm at 540 nm and  $3.3 \times 10^{14}$  photons/s/cm at 600 nm.

### Author Contributions

Conceived and designed the experiments: JRB PJS GEP. Performed the experiments: JRB GEP EMW. Analyzed the data: JRB PJS GEP. Wrote the paper: JRB PJS GEP.

## References

- Berson DM, Dunn FA, Takao M (2002) Phototransduction by retinal ganglion cells that set the circadian clock. *Science* 295: 1070–1075.
- Hattar S, Liao HW, Takao M, Berson DM, Yau KW (2002) Melanopsin-containing retinal ganglion cells: architecture, projections, and intrinsic photosensitivity. *Science* 295: 1065–1070.
- Gooley JJ, Lu J, Fischer D, Saper CB (2003) A broad role for melanopsin in nonvisual photoreception. *J Neurosci* 23: 7093–7106.
- Morin LP, Blanchard JH, Provencio I (2003) Retinal ganglion cell projections to the hamster suprachiasmatic nucleus, intergeniculate leaflet, and visual midbrain: bifurcation and melanopsin immunoreactivity. *J Comp Neurol* 465: 401–416.
- Sollars PJ, Smeraski CA, Kaufman JD, Ogilvie MD, Provencio I, et al. (2003) Melanopsin and non-melanopsin expressing retinal ganglion cells innervate the hypothalamic suprachiasmatic nucleus. *Vis Neurosci* 20: 601–610.
- Hattar S, Kumar M, Park A, Tong P, Tung J, et al. (2006) Central projections of melanopsin-expressing retinal ganglion cells in the mouse. *J Comp Neurol* 497: 326–349.
- Brown TM, Gias C, Hatori M, Keding SR, Semo M, et al. (2010) Melanopsin contributions to irradiance coding in the thalamo-cortical visual system. *PLoS Biol* 8: e1000558.
- Ecker JL, Dumitrescu ON, Wong KY, Alam NM, Chen SK, et al. (2010) Melanopsin-expressing retinal ganglion cell photoreceptors: cellular diversity and role in pattern vision. *Neuron* 67: 49–60.
- Zhang D-Q, Wong KY, Sollars PJ, Berson DM, Pickard GE, et al. (2008) Intra-retinal signaling by ganglion cell photoreceptors to dopaminergic amacrine neurons. *Proc Natl Acad Sci USA* 105: 14181–14186.
- Pérez de Sevilla Müller L, Do MTH, Yau K-W, He S, Baldrige WH (2010) Tracer coupling of intrinsically photosensitive retinal ganglion cells to amacrine cells in the mouse retina. *J Comp Neurol* 518: 4813–4824.
- Vaney DI (2002) Retinal neurons: cell types and coupled networks. *Prog Brain Res* 136: 239–254.
- Kamasawa N, Furman CS, Davidson KGV, Sampson JA, Magnic AR, et al. (2006) Abundance and ultrastructural diversity of neuronal gap junctions in the OFF and ON sublaminae of the inner plexiform layer of rat and mouse retina. *Neurosci* 142: 1093–1117.
- Sterling P, Demb JB (2004) Retina. In: *The synaptic organization of the brain*, Sheperd GM (ed). Oxford University Press, New York. pp 217–269.
- Sekaran SS, Foster RG, Lucas RJ, Hankins MW (2003) Calcium imaging reveals a network of intrinsically light-sensitive inner-retinal neurons. *Curr Biol* 13: 1290–1298.
- Sekaran SS, Lupi D, Jones SL, Sheely CJ, Hattar S, et al. (2005) Melanopsin-dependent photoreception provides earliest light detection in the mammalian retina. *Curr Biol* 15: 1099–1107.
- Davidson JS, Baumgarten IM (1988) Glycylrrhethinic acid derivatives: a novel class of inhibitors of gap-junctional intercellular communication. Structure-activity relationships. *J Pharmacol Exp Ther* 246: 1104–1107.
- Tu DC, Zhang D, Demas J, Slutsky EB, Provencio I, et al. (2005) Physiologic diversity and development of intrinsically photosensitive retinal ganglion cells. *Neuron* 48: 987–999.
- Weng S, Wong KY, Berson DM (2009) Circadian modulation of melanopsin-driven light response in rat ganglion-cell photoreceptors. *J Biol Rhythms* 24: 391–402.
- Catterall WA, Perez-Reyes E, Snutch TP, Striessnig J (2005) International union of pharmacology. XLVIII. Nomenclature and structure-function relationships of voltage-gated calcium channels. *Pharmacol Rev* 57: 411–425.
- Hartwick ATE, Bramley JR, Yu J, Stevens KT, Allen CN, et al. (2007) Light-evoked calcium responses of isolated melanopsin-expressing retinal ganglion cells. *J Neurosci* 27: 13468–13480.
- Vessey JP, Lalonde MR, Mizan HA, Welch NC, Kelly MEM, et al. (2004) Carbenoxolone inhibition of voltage-gated Ca channels and synaptic transmission in the retina. *J Neurophysiol* 92: 1252–1256.
- Thompson RJ, Zhou N, MacVicar BA (2006) Ischemia opens neuronal gap junction hemichannels. *Science* 312: 924–927.
- Wilson JM, Cowan AI, Brownstone RM (2007) Heterogeneous electrotonic coupling and synchronization of rhythmic bursting activity in mouse Hb9 interneurons. *J Neurophysiol* 98: 2370–2381.
- Tovar KR, Maher BJ, Westbrook GL (2009) Direct actions of carbenoxolone on synaptic transmission and neuronal membrane properties. *J Neurophysiol* 102: 974–978.
- Liu X, Hashimoto-Torii K, Torii M, Ding C, Rakic P (2010) Gap junctions/hemichannels modulate interkinetic nuclear migration in the forebrain precursors. *J Neurosci* 30: 4197–4209.
- Pan F, Mills SL, Massey SC (2007) Screening of gap junction antagonists on dye coupling in the rabbit retina. *Vis Neurosci* 24: 609–618.
- Hartwick ATE, Hamilton CM, Baldrige WH (2008) Glutamatergic calcium dynamics and deregulation of rat retinal ganglion cells. *J Physiol* 586: 3425–3446.
- Warren EJ, Allen CN, Brown RL, Robinson DW (2006) The light-activated signalling pathway in SCN-projecting rat retinal ganglion cells. *Eur J Neurosci* 23: 2477–2487.
- Graham DM, Wong KY, Shapiro P, Frederick C, Pattabiraman K, et al. (2009) Melanopsin ganglion cells use a membrane-associated rhabdomic phototransduction cascade. *J Neurophysiol* 99: 2522–2532.
- Perez-Leighton CE, Schmidt TM, Abramowitz J, Birnbaumer L, Kofuji P (2011) Intrinsic phototransduction persists in melanopsin-expressing ganglion cells lacking diacylglycerol-sensitive TRPC subunits. *Eur J Neurosci* 33: 856–867.
- Harks EGA, de Roos ADG, Peters PHJ, de Haan LH, Brouwer A, et al. (2001) Fenamates: a novel class of reversible gap junction blockers. *J Pharmacol Exp Ther* 298: 1033–1041.
- Veruki ML, Hartveit E (2009) Meclofenamic acid blocks electrical synapses of retinal AII amacrine and ON-cone bipolar cells. *J Neurophysiol* 101: 2339–2347.
- Veruki ML, Olteidal L, Hartveit E (2010) Electrical coupling and passive membrane properties of AII amacrine cells. *J Neurophysiol* 103: 1456–1466.
